# Supplementary material for: Electron transfer between neptunium and sodium chlorite in acidic chloride media
Source: Royal Society of Chemistry journal article supplement (doi:10.1039/d3nj03730d), 2023-12-22
Supplement: d3nj03730d1.pdf [file d3nj03730d1.pdf]

## Supporting Information: Electron Transfer Between Neptunium and Sodium Chlorite in Acidic Chloride Media

Brian T. Arko,<sup>1,2</sup> David Dan,<sup>1</sup> Sara L. Adelman,<sup>1,\*</sup> David B. Kimball,<sup>1,\*</sup> Stosh A. Kozimor,<sup>1,\*</sup> Jenifer C. Shafer.<sup>2,\*</sup>

<sup>1</sup>*Los Alamos National Laboratory, Los Alamos, NM 87545 (U.S.A.)*

<sup>2</sup>*Department of Chemistry, Colorado School of Mines, Golden, CO 90401 (U.S.A.)*

\*Corresponding author; [sadelman@lanl.gov](mailto:sadelman@lanl.gov), [dkimball@lanl.gov](mailto:dkimball@lanl.gov), [stosh@lanl.gov](mailto:stosh@lanl.gov), [jshafer@mines.edu](mailto:jshafer@mines.edu)

**Table S1:** Neptunium rate law kinetics in low HCl<sub>(aq)</sub> and LiCl<sub>(aq)</sub> conditions.

| Transition                                                     | Rate Law                                                                                                                                         |
|----------------------------------------------------------------|--------------------------------------------------------------------------------------------------------------------------------------------------|
| Np <sup>4+</sup> → NpO <sub>2</sub> <sup>+</sup>               | $\frac{dNpO_2^+}{dt} = -\frac{dNp^{4+}}{dt} = (49 \pm 7 \text{ mM} \cdot \text{s}^{-1}) [Np^{4+}]^{0.300 \pm 0.008} [NaClO_2]^{0.110 \pm 0.002}$ |
| NpO <sub>2</sub> <sup>+</sup> → NpO <sub>2</sub> <sup>2+</sup> | $\frac{dNpO_2^{2+}}{dt} = -\frac{dNpO_2^+}{dt} = (3 \pm 1 \text{ mM} \cdot \text{d}^{-1}) [NpO_2^+]^{0.98 \pm 0.02} [NaClO_2]^{1.71 \pm 0.01}$   |

**Table S2:** Neptunium rate law kinetics in high Cl<sub>(aq)</sub> (>9 M LiCl) conditions.

| Transition                                                  | Rate Law                                                                                                                                          |
|-------------------------------------------------------------|---------------------------------------------------------------------------------------------------------------------------------------------------|
| Np <sup>4+</sup> → NpO <sub>2</sub> <sup>2+</sup><br>(LiCl) | $\frac{dNpO_2^{2+}}{dt} = -\frac{dNp^{4+}}{dt} = (0.24 \pm 0.09 \text{ mM} \cdot \text{min}) [Np^{4+}]^{4.11 \pm 0.09} [NaClO_2]^{0.50 \pm 0.07}$ |

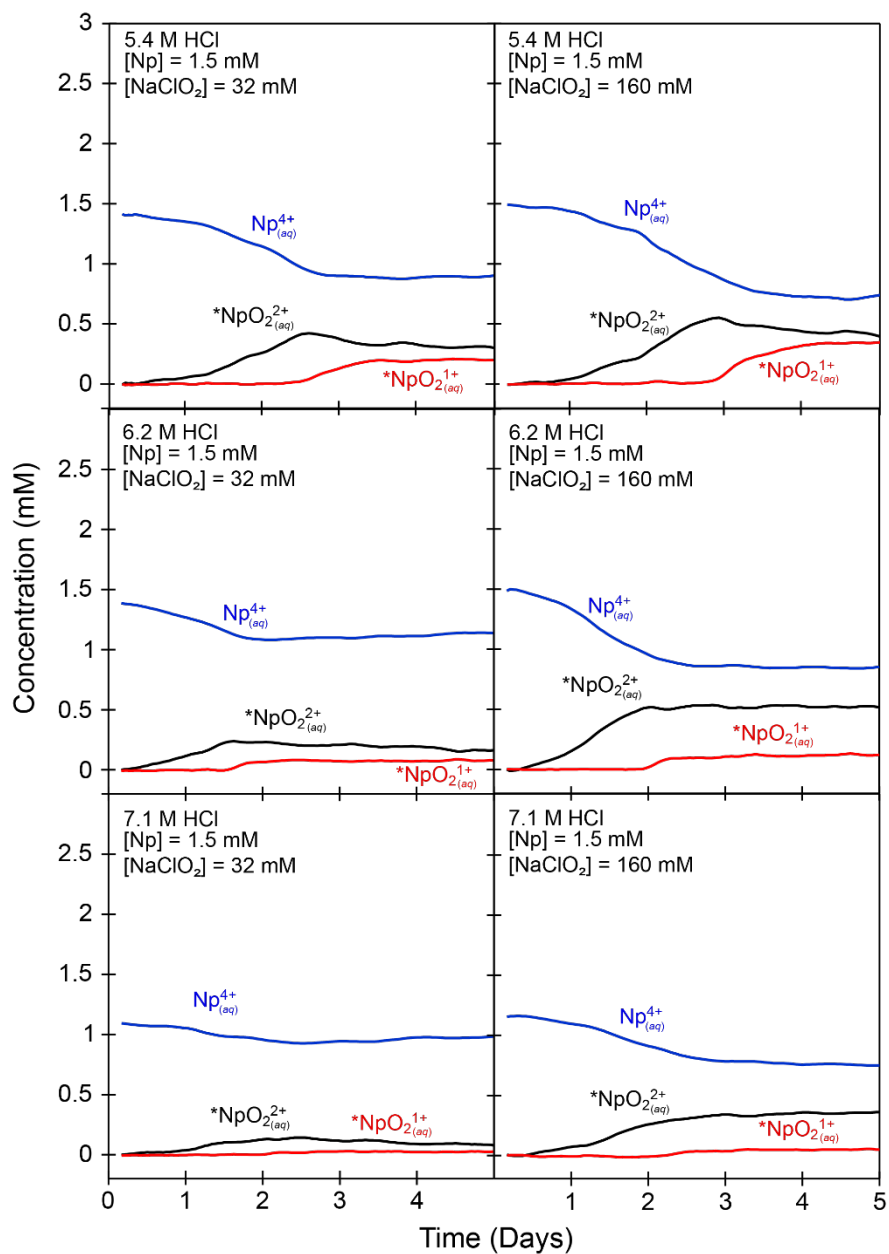

**Figure S1:** 1.5 mM  $\text{Np}^{4+}_{(aq)}$  25°C in various concentrations of  $\text{HCl}_{(aq)}$  reacted with different concentrations of  $\text{NaClO}_{2(aq)}$ . \*signifies estimated concentrations of  $\text{NpO}_2^{+}_{(aq)}$  and  $\text{NpO}_2^{2+}_{(aq)}$  using molar extinction coefficients from a previous report.<sup>52</sup>

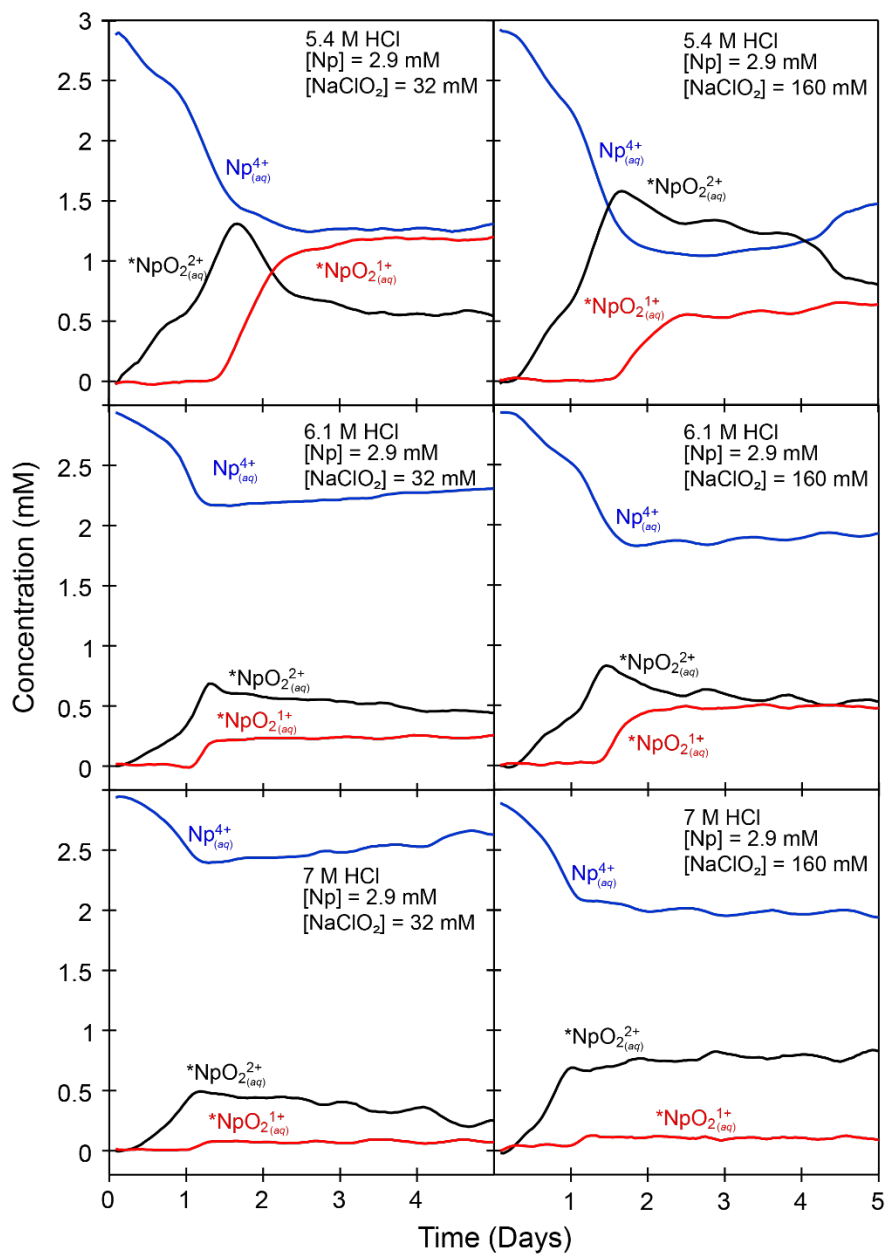

**Figure S2:** 2.9 mM  $\text{Np}^{4+}_{(aq)}$  25°C in various concentrations of  $\text{HCl}_{(aq)}$  reacted with different concentrations of  $\text{NaClO}_{2(aq)}$ . \*Signifies estimated concentrations of  $\text{NpO}_2^{+}_{(aq)}$  and  $\text{NpO}_2^{2+}_{(aq)}$  using molar extinction coefficients from a previous report.<sup>52</sup>

Example calculation of rate constant determination shown in Table S1 and Table S2.

$$\frac{\text{Initial Rate}_a}{\text{Initial Rate}_b} = \frac{k[\text{Np}]_a^x [\text{NaClO}_2]_a^y}{k[\text{Np}]_a^x [\text{NaClO}_2]_b^y}$$

$$\frac{\text{Initial Rate}_a}{\text{Initial Rate}_b} = \frac{k[\text{Np}]_a^x [\text{NaClO}_2]_a^y}{k[\text{Np}]_a^x [\text{NaClO}_2]_b^y}$$

$$\frac{\text{Initial Rate}_a}{\text{Initial Rate}_b} = \frac{[\text{NaClO}_2]_a^y}{[\text{NaClO}_2]_b^y}$$

$$\ln\left(\frac{\text{Initial Rate}_a}{\text{Initial Rate}_b}\right) = \ln\left(\frac{[\text{NaClO}_2]_a^y}{[\text{NaClO}_2]_b^y}\right)$$

$$y = \frac{\ln\left(\frac{\text{Initial Rate}_a}{\text{Initial Rate}_b}\right)}{\ln\left(\frac{[\text{NaClO}_2]_a}{[\text{NaClO}_2]_b}\right)}$$
